# Supplementary material for: Variation in Genes Related to Cochlear Biology Is Strongly Associated with Adult-Onset Deafness in Border Collies
Source: PubMed Central journal article supplement (PMC3441646; doi:10.1371/journal.pgen.1002898), 2012-09-13

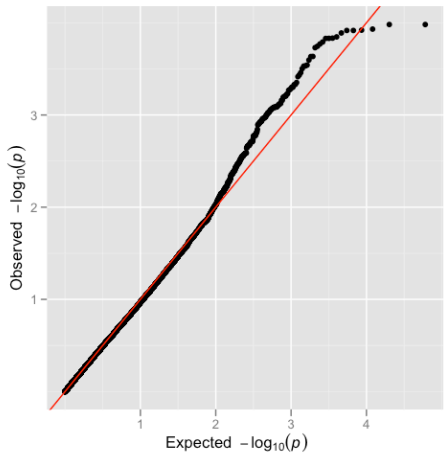

Supplement: pgen.1002898.s002.pdf [file pgen.1002898.s002.pdf]
